# Supplementary material for: Mitochondrial Retrograde Signaling Contributes to Metabolic Differentiation in Yeast Colonies
Source: MDPI journal article supplement (doi:10.3390/ijms22115597), 2021-05-25
Supplement: s1 [file s1]

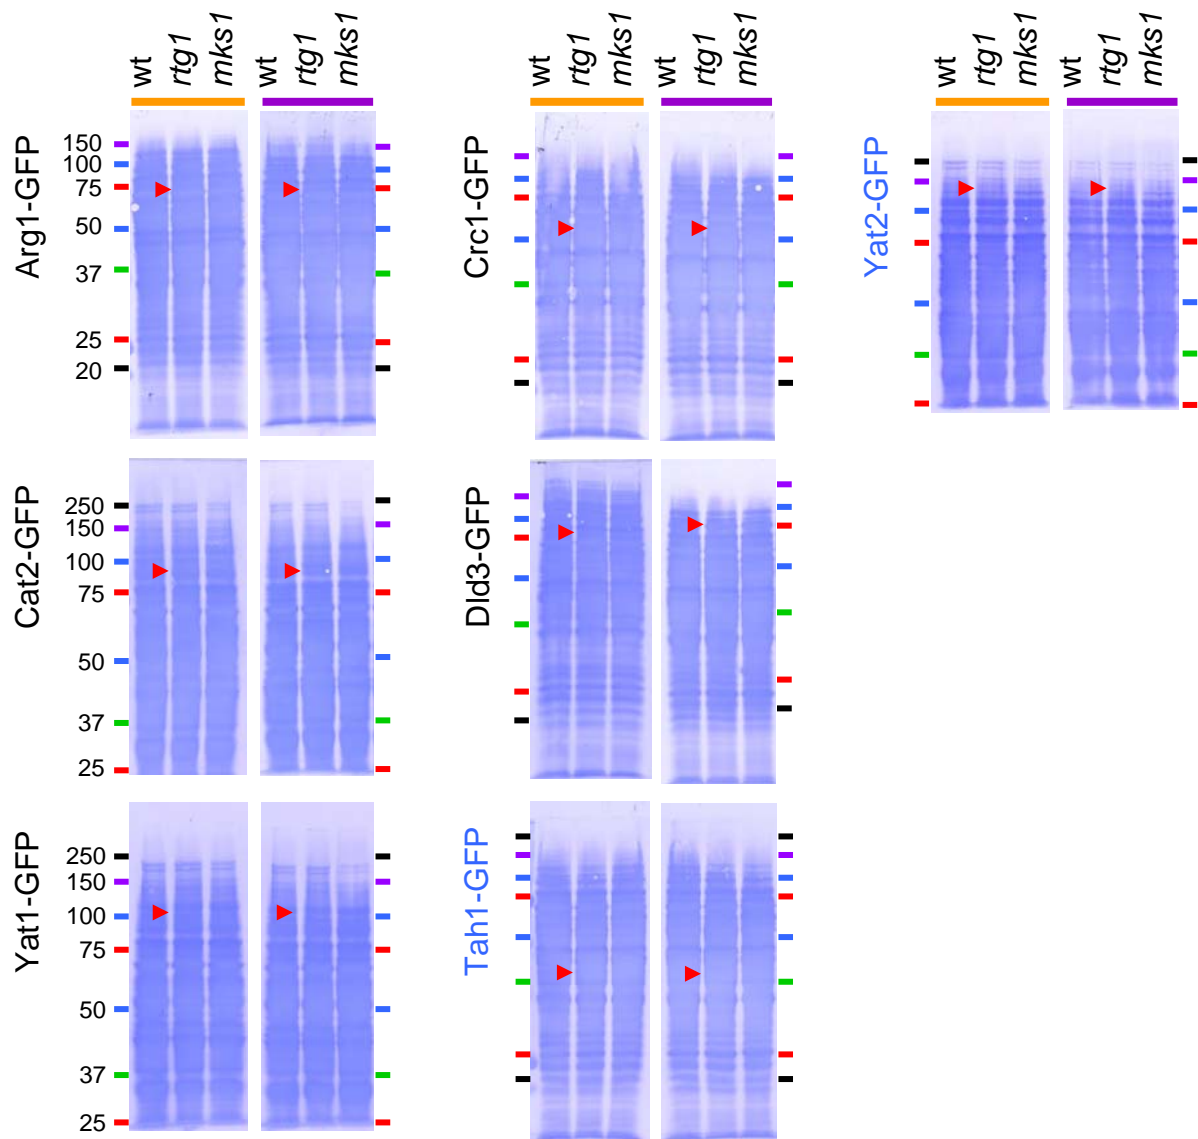

**Figure S1: Western blot loading controls.** Loading controls for Figure 3A.  
Arrows indicate the position of a particular protein on a Western blot.

Giant colonies

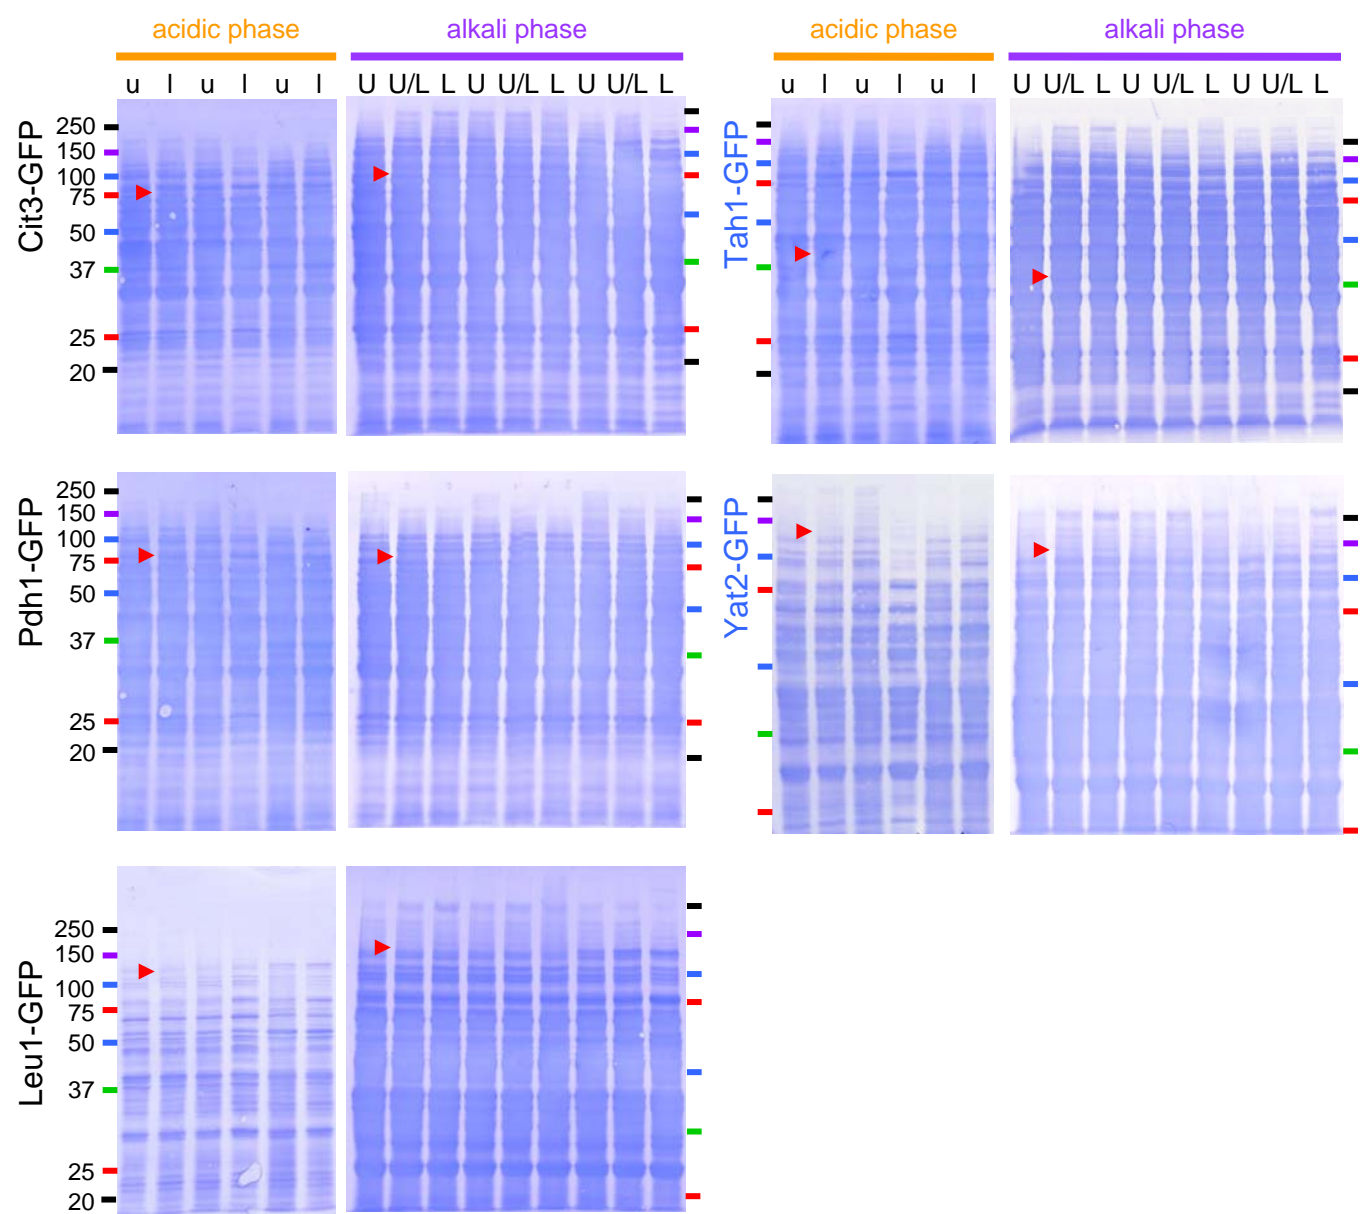

**Figure S2: Western blot loading controls.** Loading controls for Figure 3B.  
Arrows indicate the position of a particular protein on a Western blot.

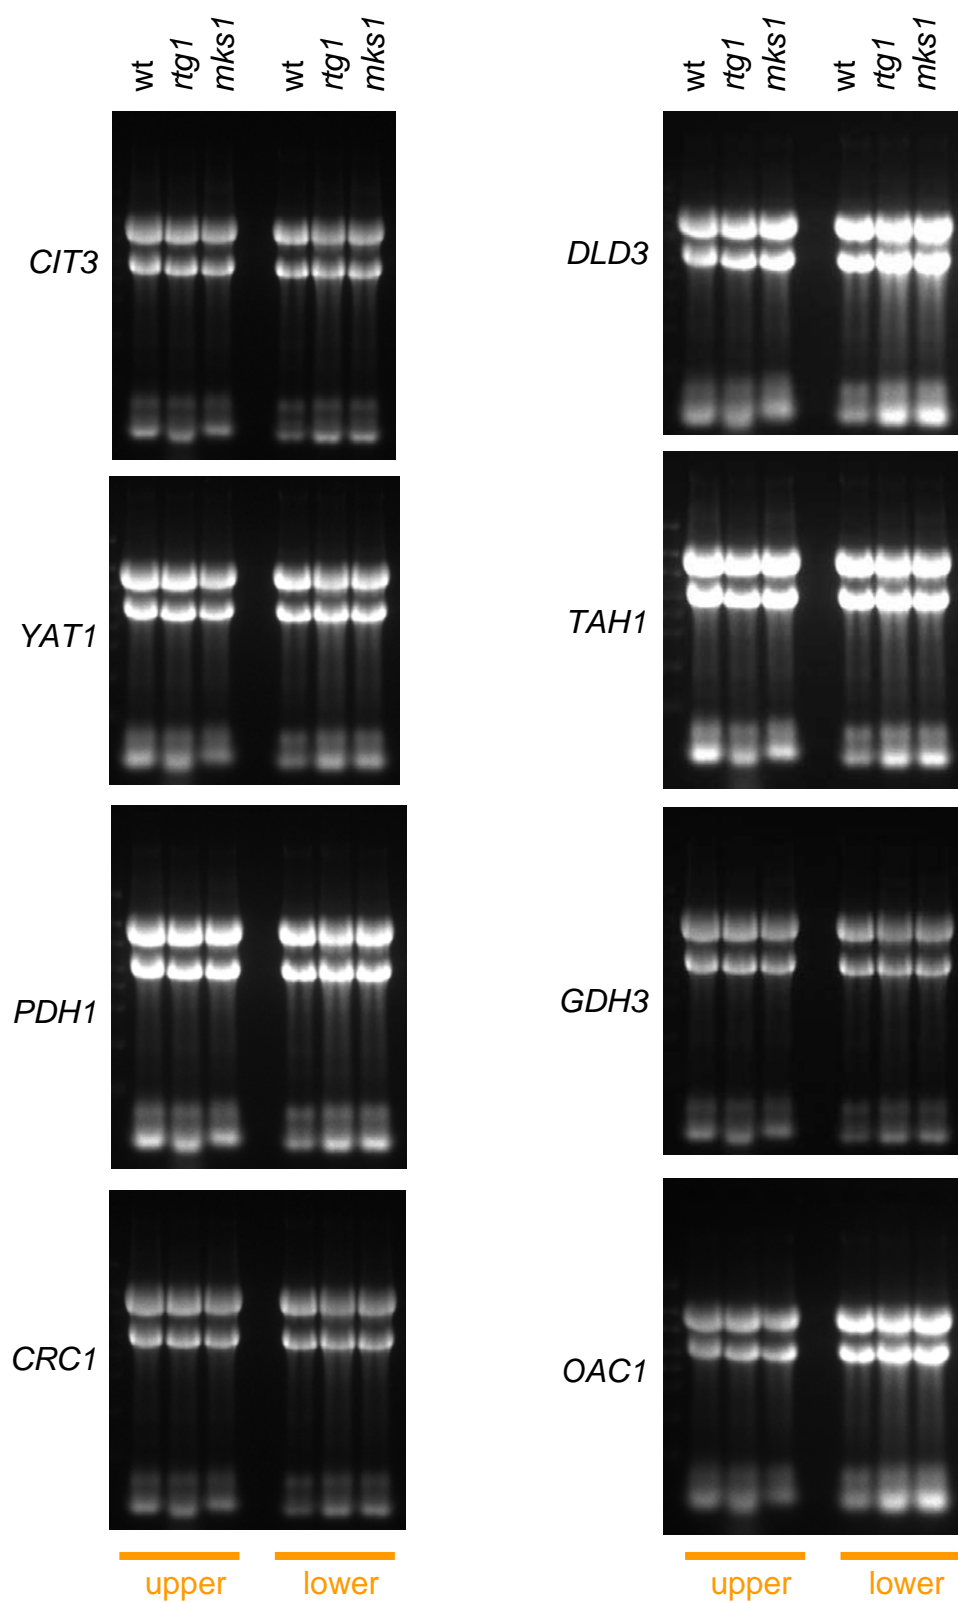

**Figure S3: Northern blot loading controls.** Loading controls for Figure 5.
