# Supplementary material for: Mitochondrial Retrograde Signaling Contributes to Metabolic Differentiation in Yeast Colonies
Source: MDPI journal article supplement (doi:10.3390/ijms22115597), 2021-05-25
Supplement: s1 [file s1]

Table S4. List of the primers

| Primer Name | Primer sequence                                                      |
|-------------|----------------------------------------------------------------------|
| ARG1-GFP FW | AAATACGGTGAATCCAAAAAACCAAAGGTGAAGAGTTGACTTTGGGTGACGGTGCTGGTTTA       |
| ARG1-GFP RV | GGAGGAAGAGATCGTTATCTATCTTGAGGCGATGAACTAGCGGACTCGATGAATTCGAGCTCG      |
| CAT2-GFP FW | ATTTTGGACGCCTTGAAAAATGAGAATAAACGAAAAAGCAAAGTTAGGTGACGGTGCTGGTTTA     |
| CAT2-GFP RV | CAAAAATATTCACAAATTAATTGAAGAGGAAAGGTGAAAAATTCATCGATGAATTCGAGCTCG      |
| CIT3-GFP FW | TCTGGAAGCACTTACCAAAGCAAGCAATGTTAACAAAGTTGGGTGACGGTGCTGGTTTA          |
| CIT3-GFP RV | TGTAATAGCAAACGAAGCATTCTTGTAATTGGAAGTGCATCGATGAATTCGAGCTCG            |
| CRC1-GFP FW | TTAGGTGTGGAGATGACTCATTCACTGTTCAAGAAGTATGGCATAGGTGACGGTGCTGGTTTA      |
| CRC1-GFP RV | CCAGAAAAAATGGGAGGCAAGTCCACCTAACAAAAATTTAATCATCGATGAATTCGAGCTCG       |
| DLD3-GFP FW | AATCACTACGATCCAAATGGAATCTTAAACCCATACAAGTACATTGGTGACGGTGCTGGTTTA      |
| DLD3-GFP RV | TAAAGAAAAAGGGTTTGCTCTTTGAAAGTTAAAAATTAACAAAGTTCGATGAATTCGAGCTCG      |
| GDH3-GFP FW | TTCGTCATGGTGGCTGACGCAATGCTTGACCAGGGAGACGTTTTTGGTGACGGTGCTGGTTTA      |
| GDH3-GFP RV | CACACTACATACACAGATAGTTACGAACAAAAAGAAAATAGCGCTTACGGTCGATGAATTCGAGCTCG |
| LEU1-GFP FW | AGAAAAAGCTGTTACAACACTTTTCGATAAAGTCCACCAGGATTGGGGTGACGGTGCTGGTTTA     |
| LEU1-GFP RV | AGACACATGTTATTGACGCCAGGTTTGACGTTGTTTTCACTGTTTCGATGAATTCGAGCTCG       |
| OAC1-GFP FW | ATGAAACTAGTTTATTCGATAGAGTCGAGAGTTTTAGGCCATAATGGTGACGGTGCTGGTTTA      |
| OAC1-GFP RV | CTGGCCAATGAATGAAACTTCAAACCTCGGAGTTTGTTATGGGAATCGATGAATTCGAGCTCG      |
| PDH1-GFP FW | TTGAATATGCAAATCGACAAATACATGGATTTGTTTACTGAGGGAGGTGACGGTGCTGGTTTA      |
| PDH1-GFP RV | AATTGAAGTAGGTACCATGCCGTTTCGCTCTTAAAGAGCCAACCATTCGATGAATTCGAGCTCG     |
| TAH1-GFP FW | CCTGTTGTAGAGGTTGATGAACTACCGGAGGGATACGACCGGTCCGGTGACGGTGCTGGTTTA      |
| TAH1-GFP RV | TATATAATTTTAAAGATAAATTAGAAGTGTTCCCTTTCTCTTTCTCGATGAATTCGAGCTCG       |
| YAT1-GFP FW | TACCTGTTGTCCGGCTACGATTACTTCGACGTGAGCGTGTCCGGTGGTGACGGTGCTGGTTTA      |
| YAT1-GFP RV | AGTAGTAAAAATAATATTGATGCGCAAAACTCAGCATAAACTCATCGATGAATTCGAGCTCG       |
| YAT2-GFP FW | TTTGACCGCAGTCGTGTGGGTAGAAAGGTGGCGACCTTAGATCAAGGTGACGGTGCTGGTTTA      |
| YAT2-GFP RV | GCTTACGCATAATGCTAGTAATAAATAGATAAACAAAGAGCGTTCTCGATGAATTCGAGCTCG      |
| RTG1 DEL FW | CAAAAAACACTAGATAGTGAACCAAAAGAAAGCACAAACCAACCAAGCTGAAGCTTCGTACGC      |
| RTG1 DEL RV | ACGAGGGTTATCACAACATAGCAATAGTGAGAGTCAGAAGTACTTGCATAGGCCACTAGTGGATCTG  |
| MKS1 DEL FW | AACACTTCCTAATTATTCTCTAATCCTAATAAAAAAAGAACTGCAGCTGAAGCTTCGTACGC       |
| MKS1 DEL RV | TTGAAAGAAGCTTTAAATACTGTATCTGATTTATTTAACTTAGTAAGCATAGGCCACTAGTGGATCTG |
